# Supplementary material for: Axon guidance cue SEMA3A promotes the aggressive phenotype of basal-like PDAC
Source: HighWire-hosted journal article supplement (doi:10.1136/gutjnl-2023-329807), 2024-04-26
Supplement: gutjnl-2023-329807supp003_data_supplement.pdf [file gutjnl-2023-329807supp003_data_supplement.pdf]

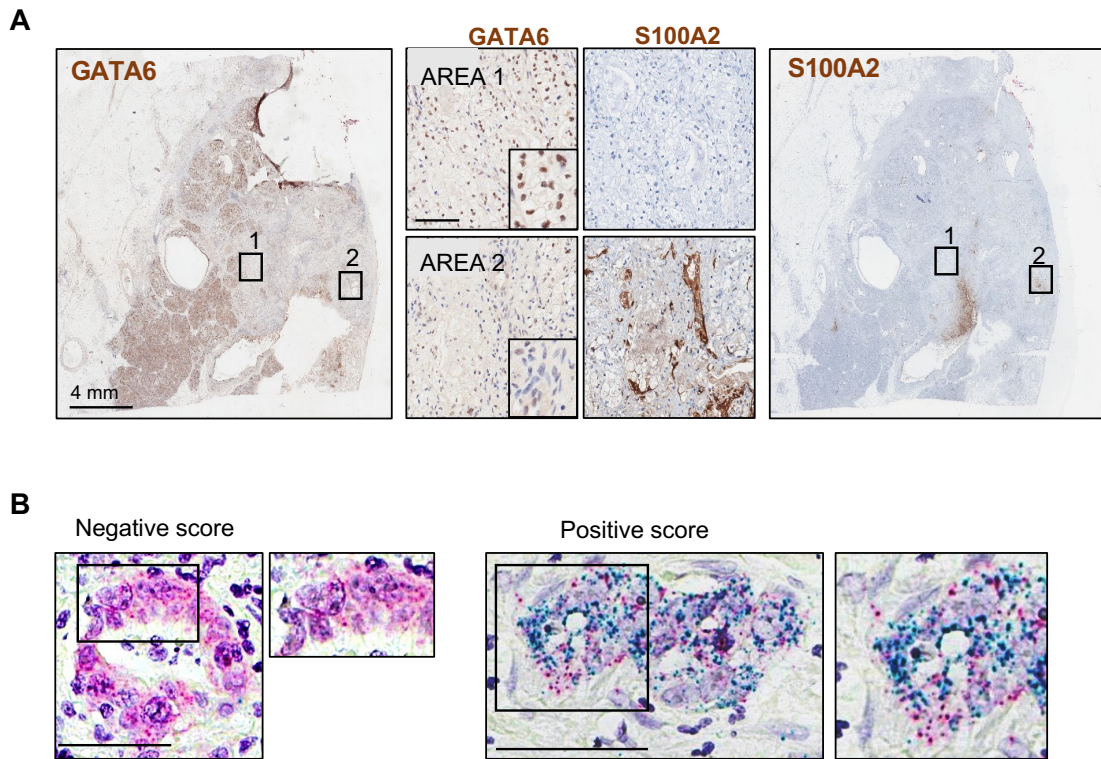

| Staining score | Microscope objective scoring                                                                  |
|----------------|-----------------------------------------------------------------------------------------------|
| 0              | No staining or less than 1 dot in every 10 cells (40X magnification)                          |
| 1              | 1-3 dots/cell (visible at 20-40X magnification)                                               |
| 2              | 4-10 dots/cell. Very few dot clusters (visible at 20-40X magnification)                       |
| 3              | > 10 dots/cell. Less than 10% positive cells have dot clusters (visible at 20X magnification) |
| 4              | > 10 dots/cell. More than 10% positive cells have dot clusters (visible at 20X magnification) |

Figure S3
