# Supplementary figures and images for: Axon guidance cue SEMA3A promotes the aggressive phenotype of basal-like PDAC
Source: HighWire-hosted journal article supplement (doi:10.1136/gutjnl-2023-329807), 2024-04-26

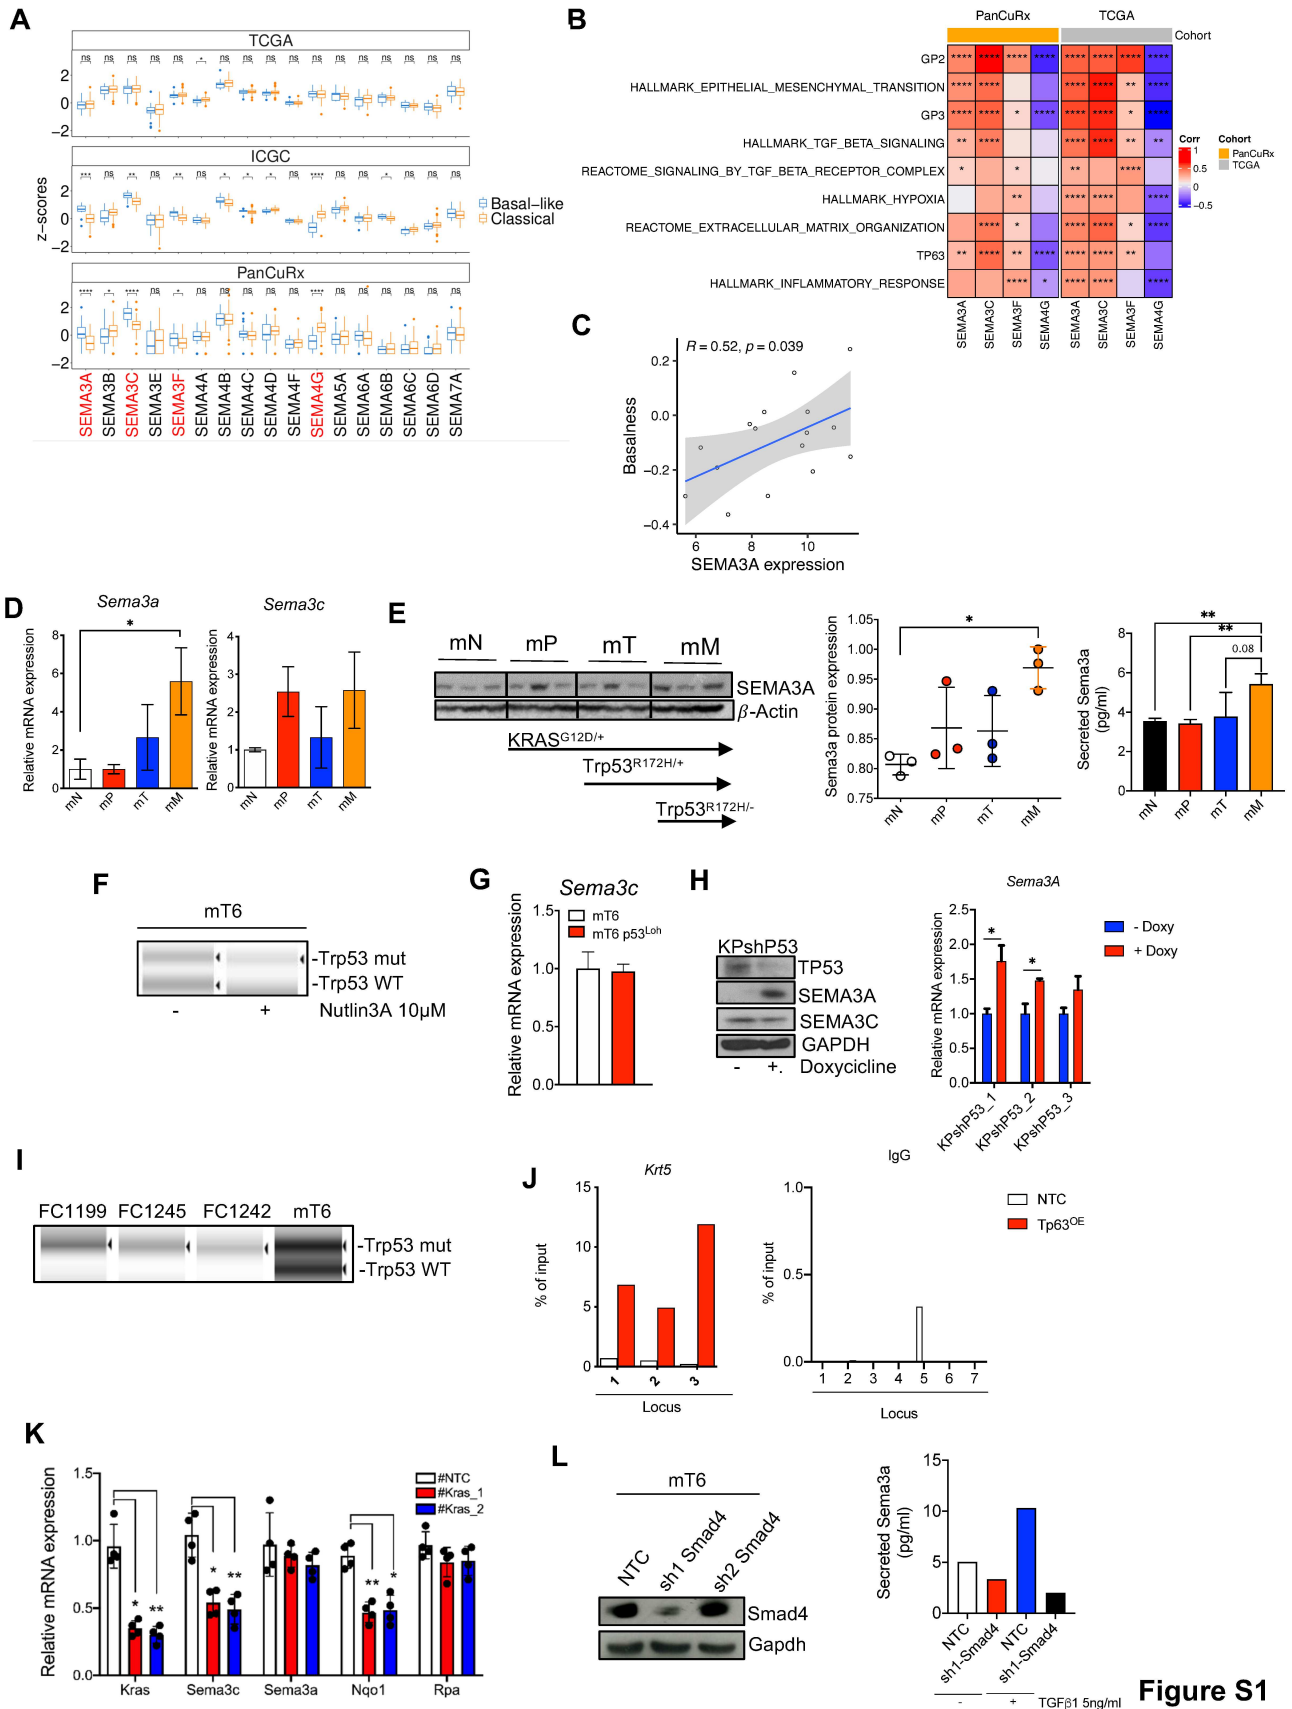

Figure S1

Supplement: gutjnl-2023-329807supp001_data_supplement.pdf [file gutjnl-2023-329807supp001_data_supplement.pdf]

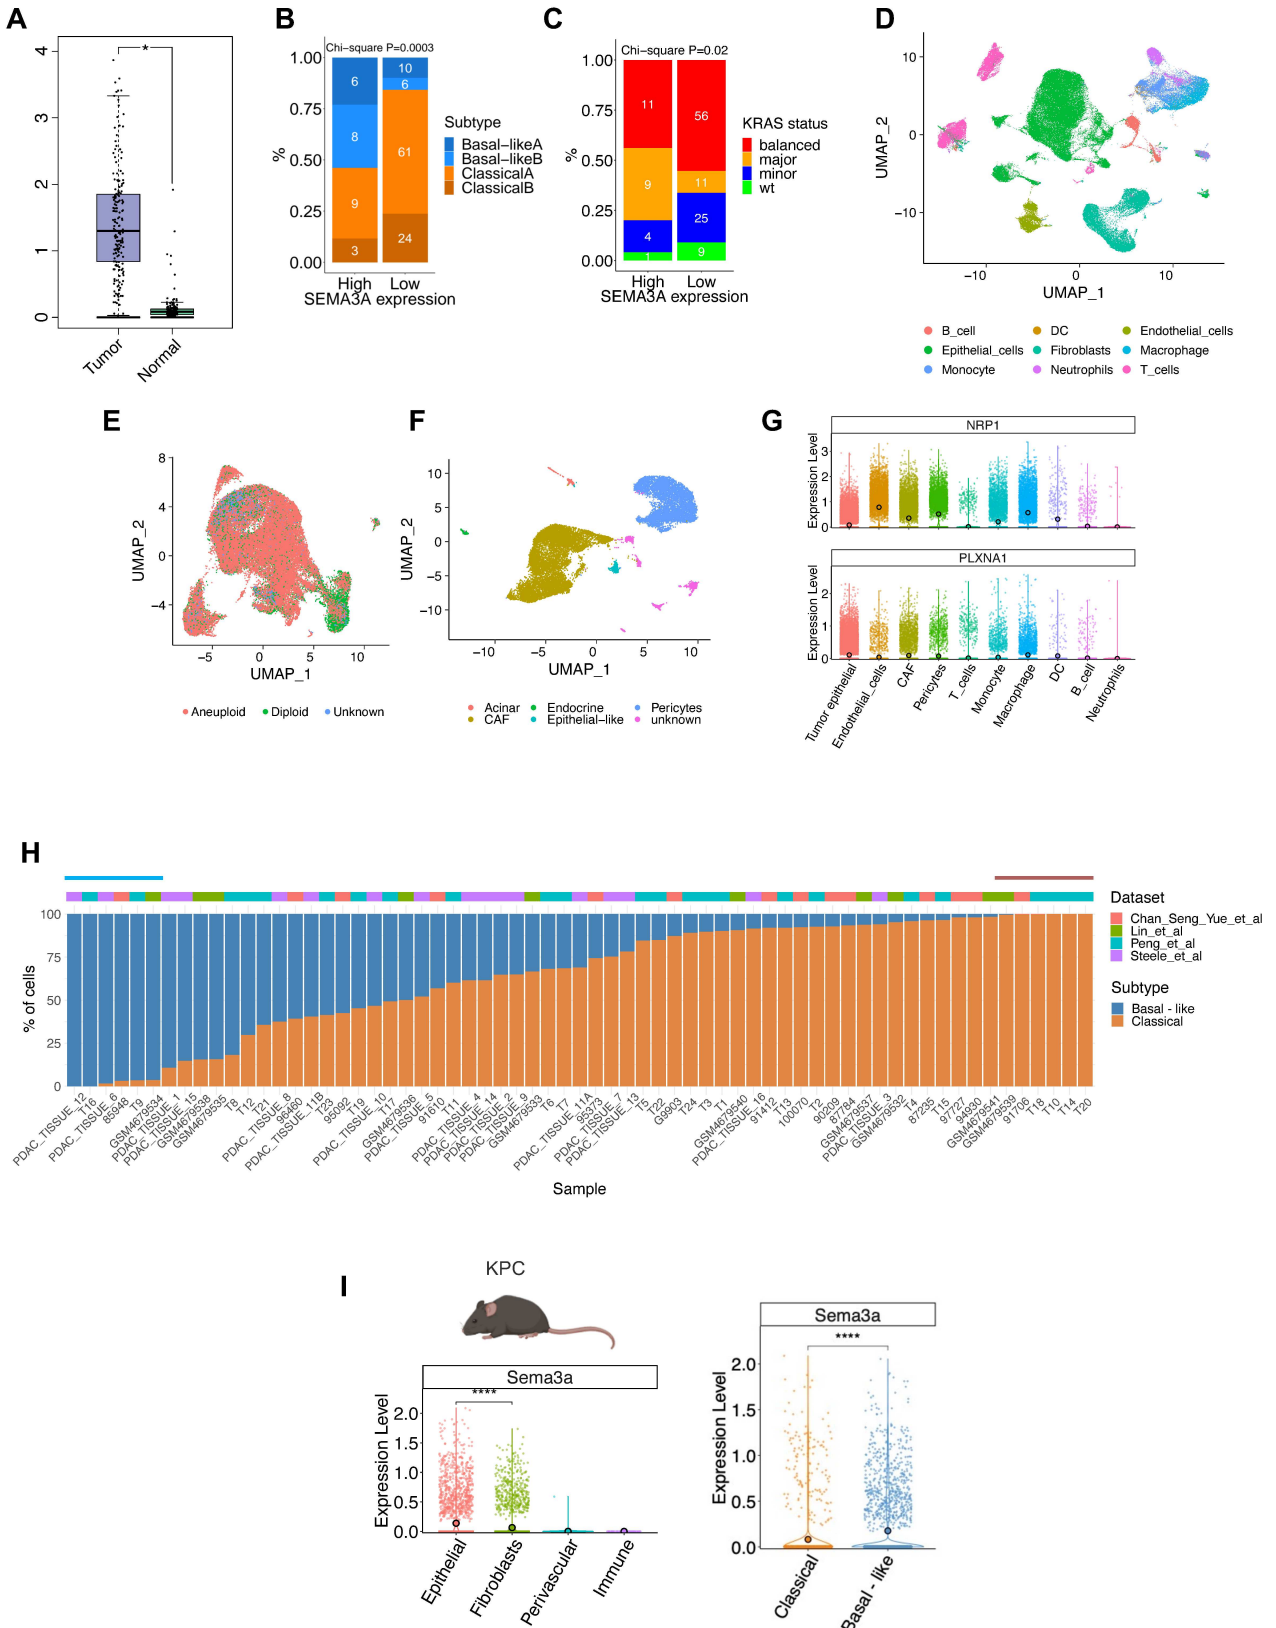

Figure S2

Supplement: gutjnl-2023-329807supp002_data_supplement.pdf [file gutjnl-2023-329807supp002_data_supplement.pdf]

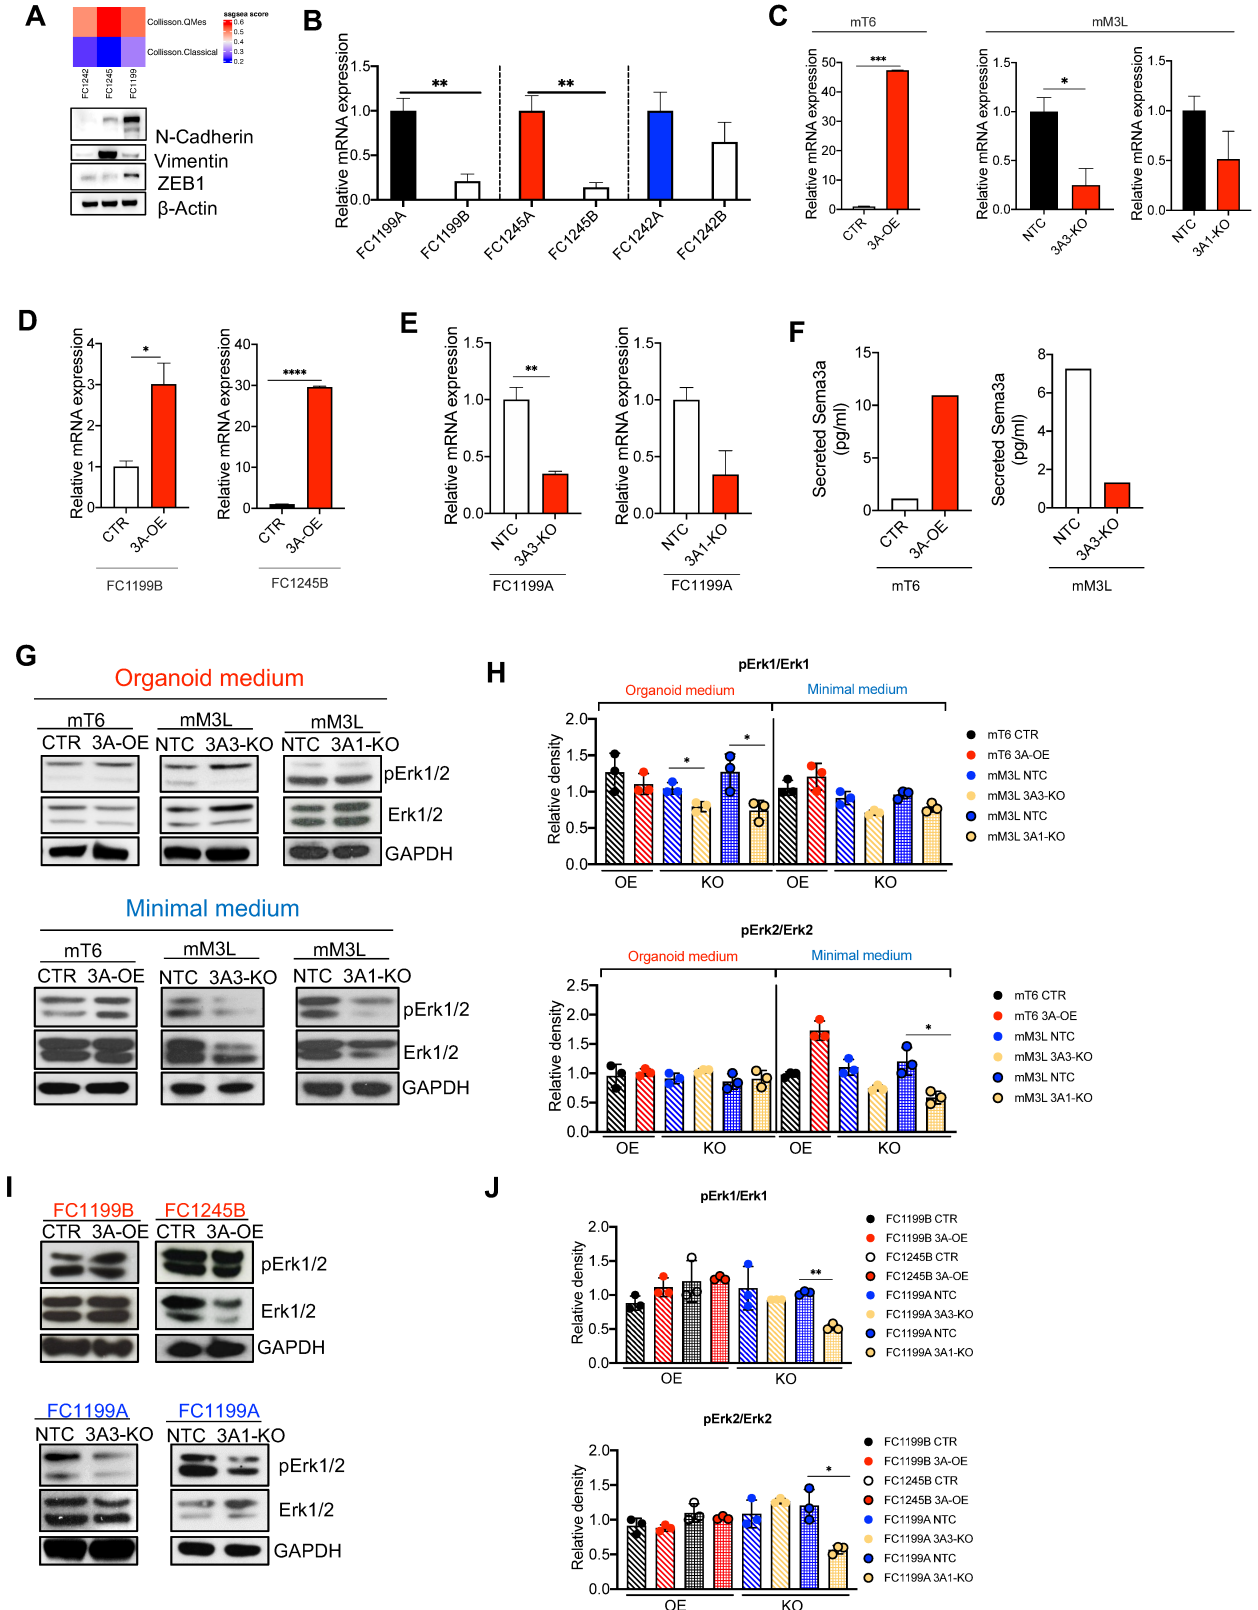

Figure S4

Supplement: gutjnl-2023-329807supp005_data_supplement.pdf [file gutjnl-2023-329807supp005_data_supplement.pdf]

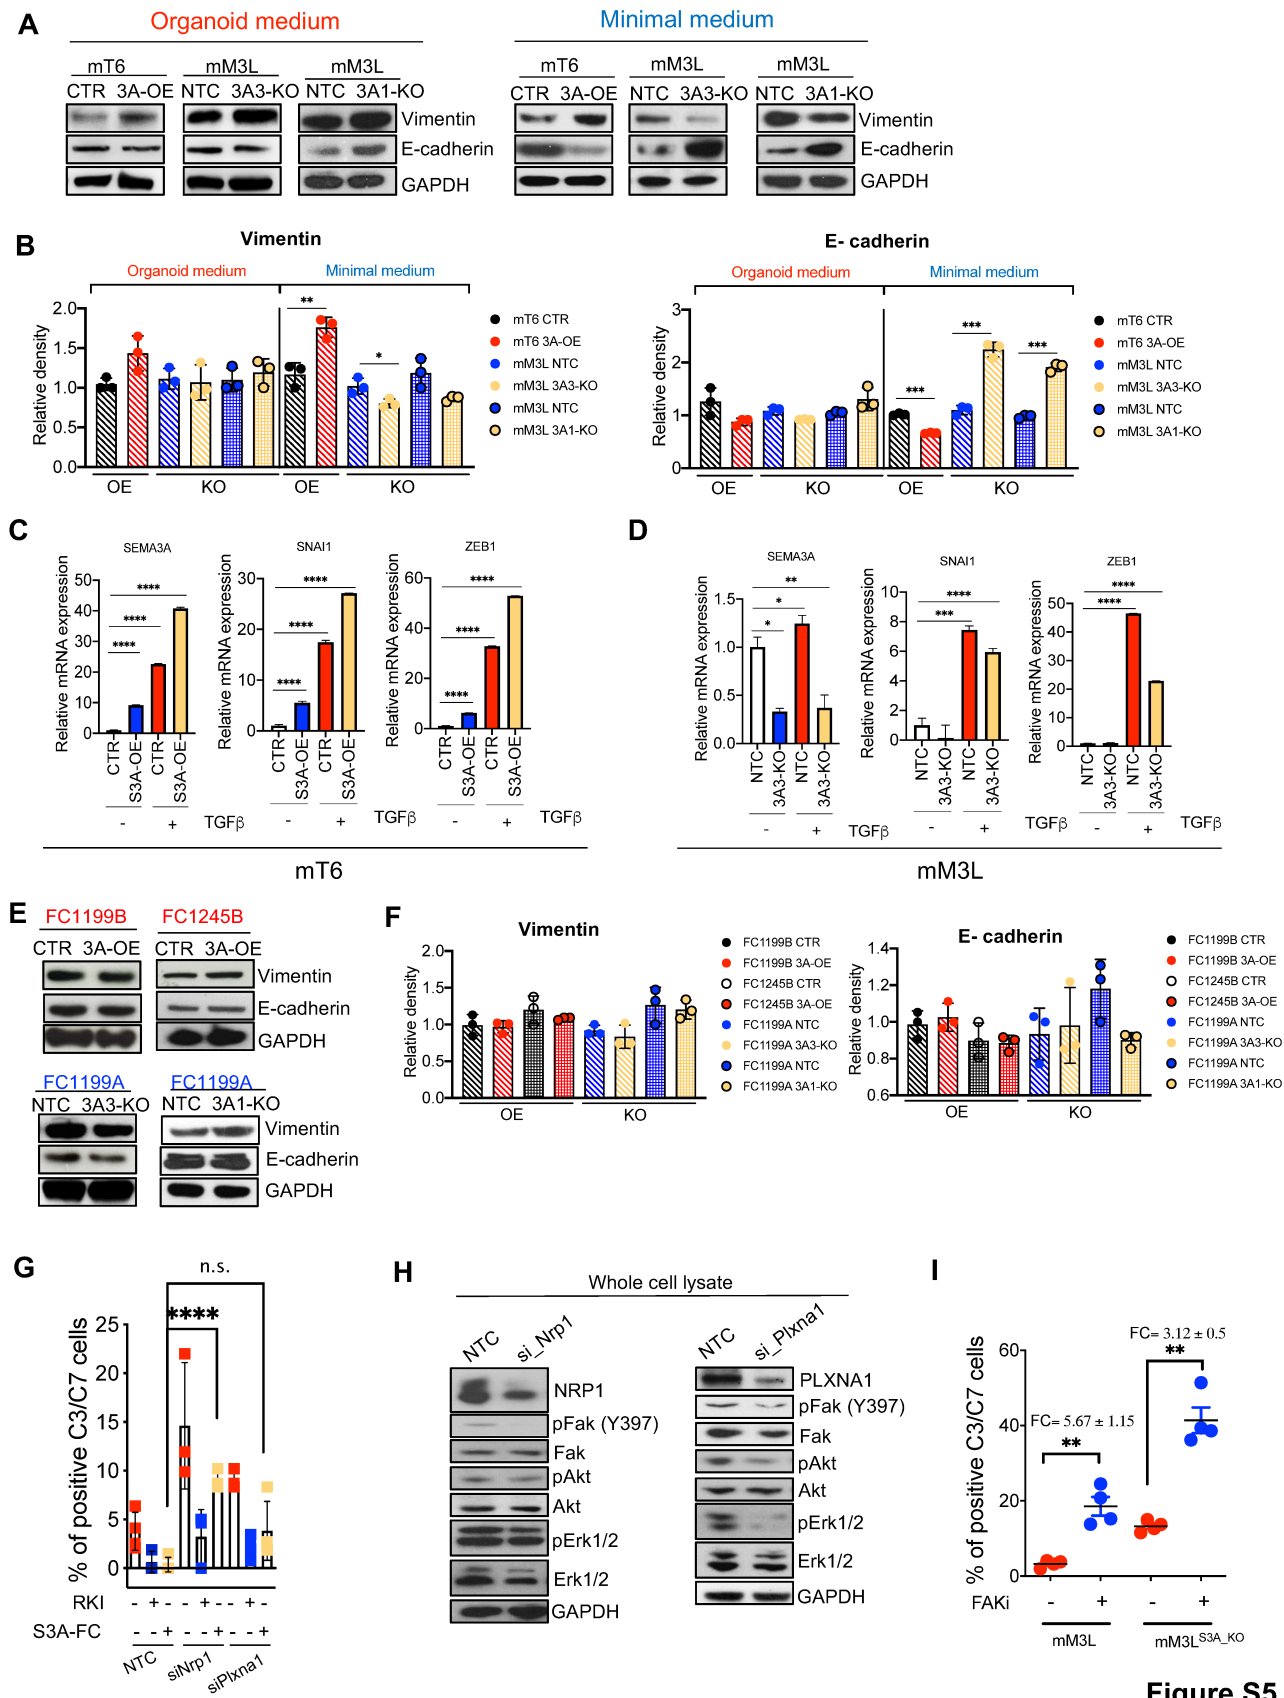

Figure S5

Supplement: gutjnl-2023-329807supp006_data_supplement.pdf [file gutjnl-2023-329807supp006_data_supplement.pdf]

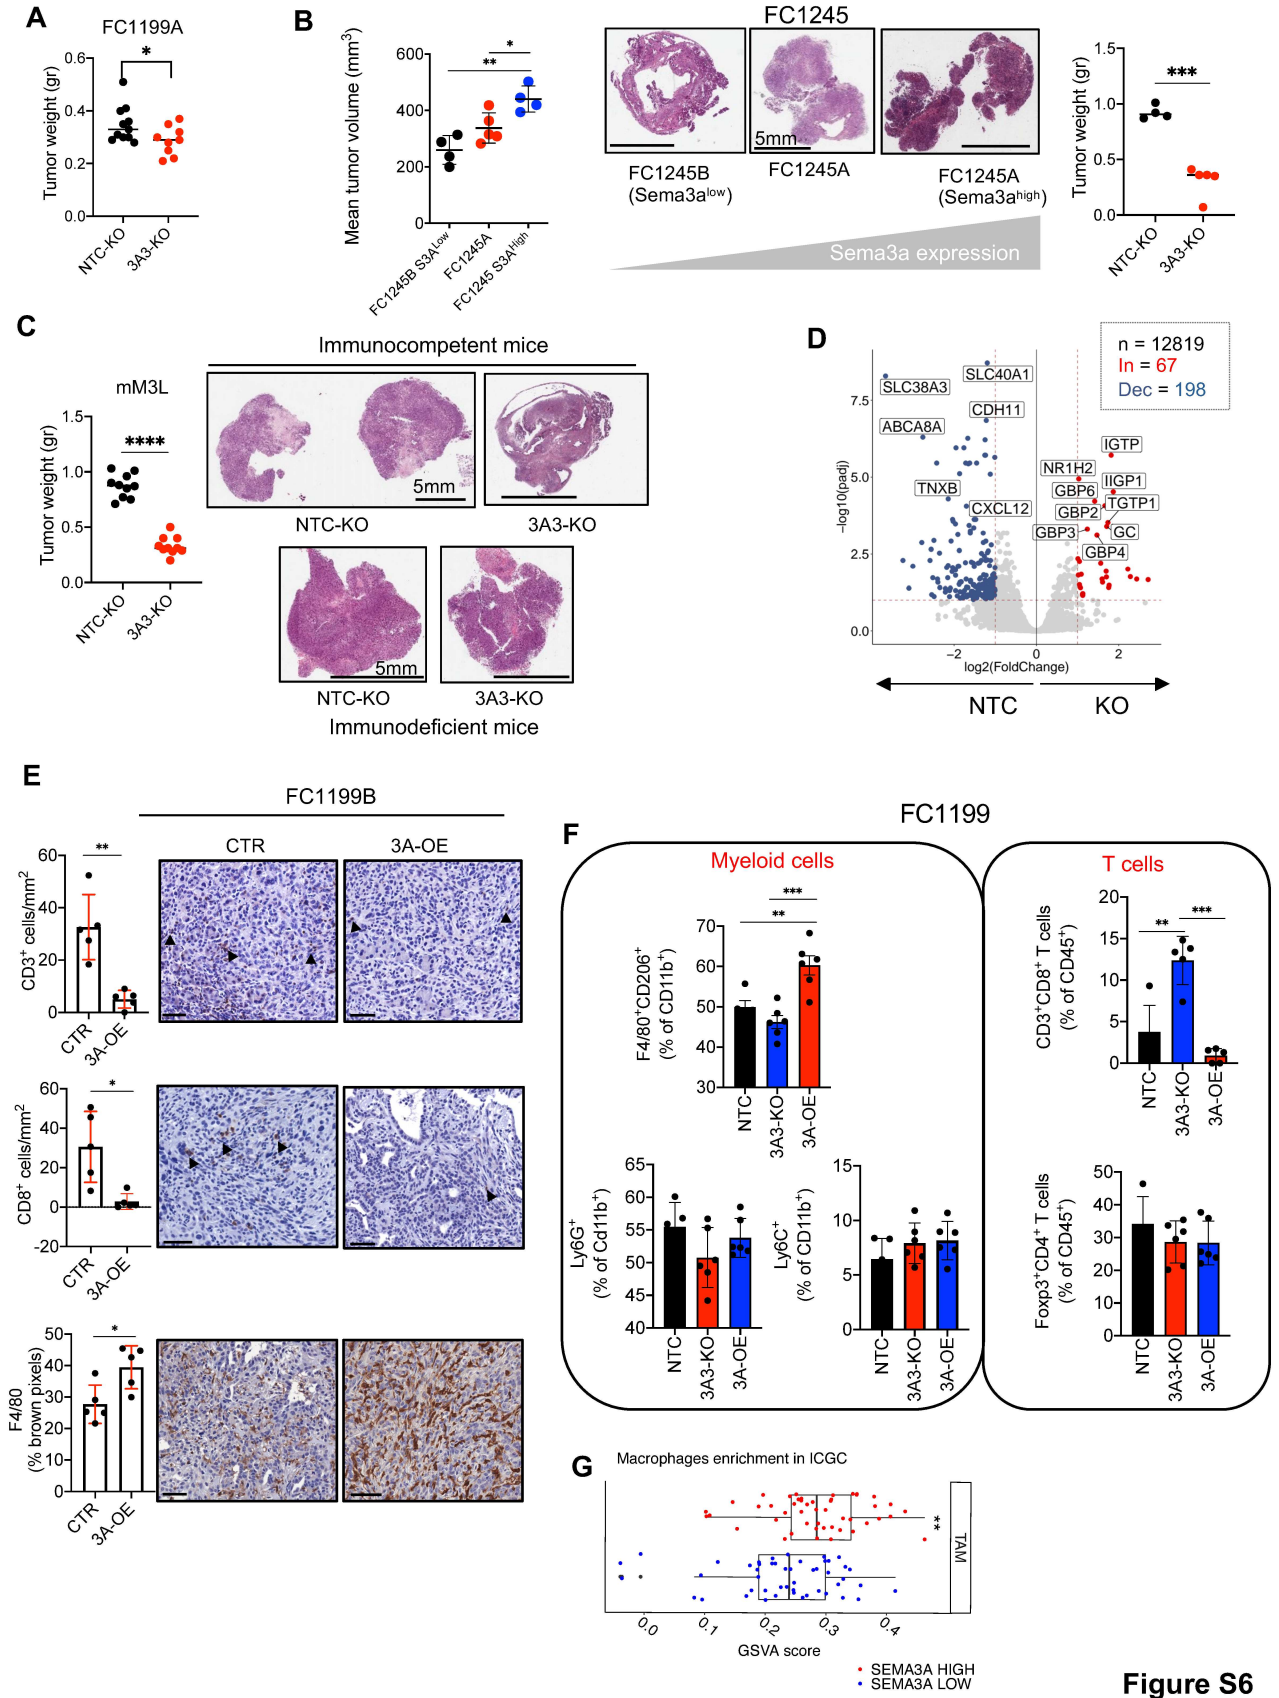

Figure S6

Supplement: gutjnl-2023-329807supp007_data_supplement.pdf [file gutjnl-2023-329807supp007_data_supplement.pdf]

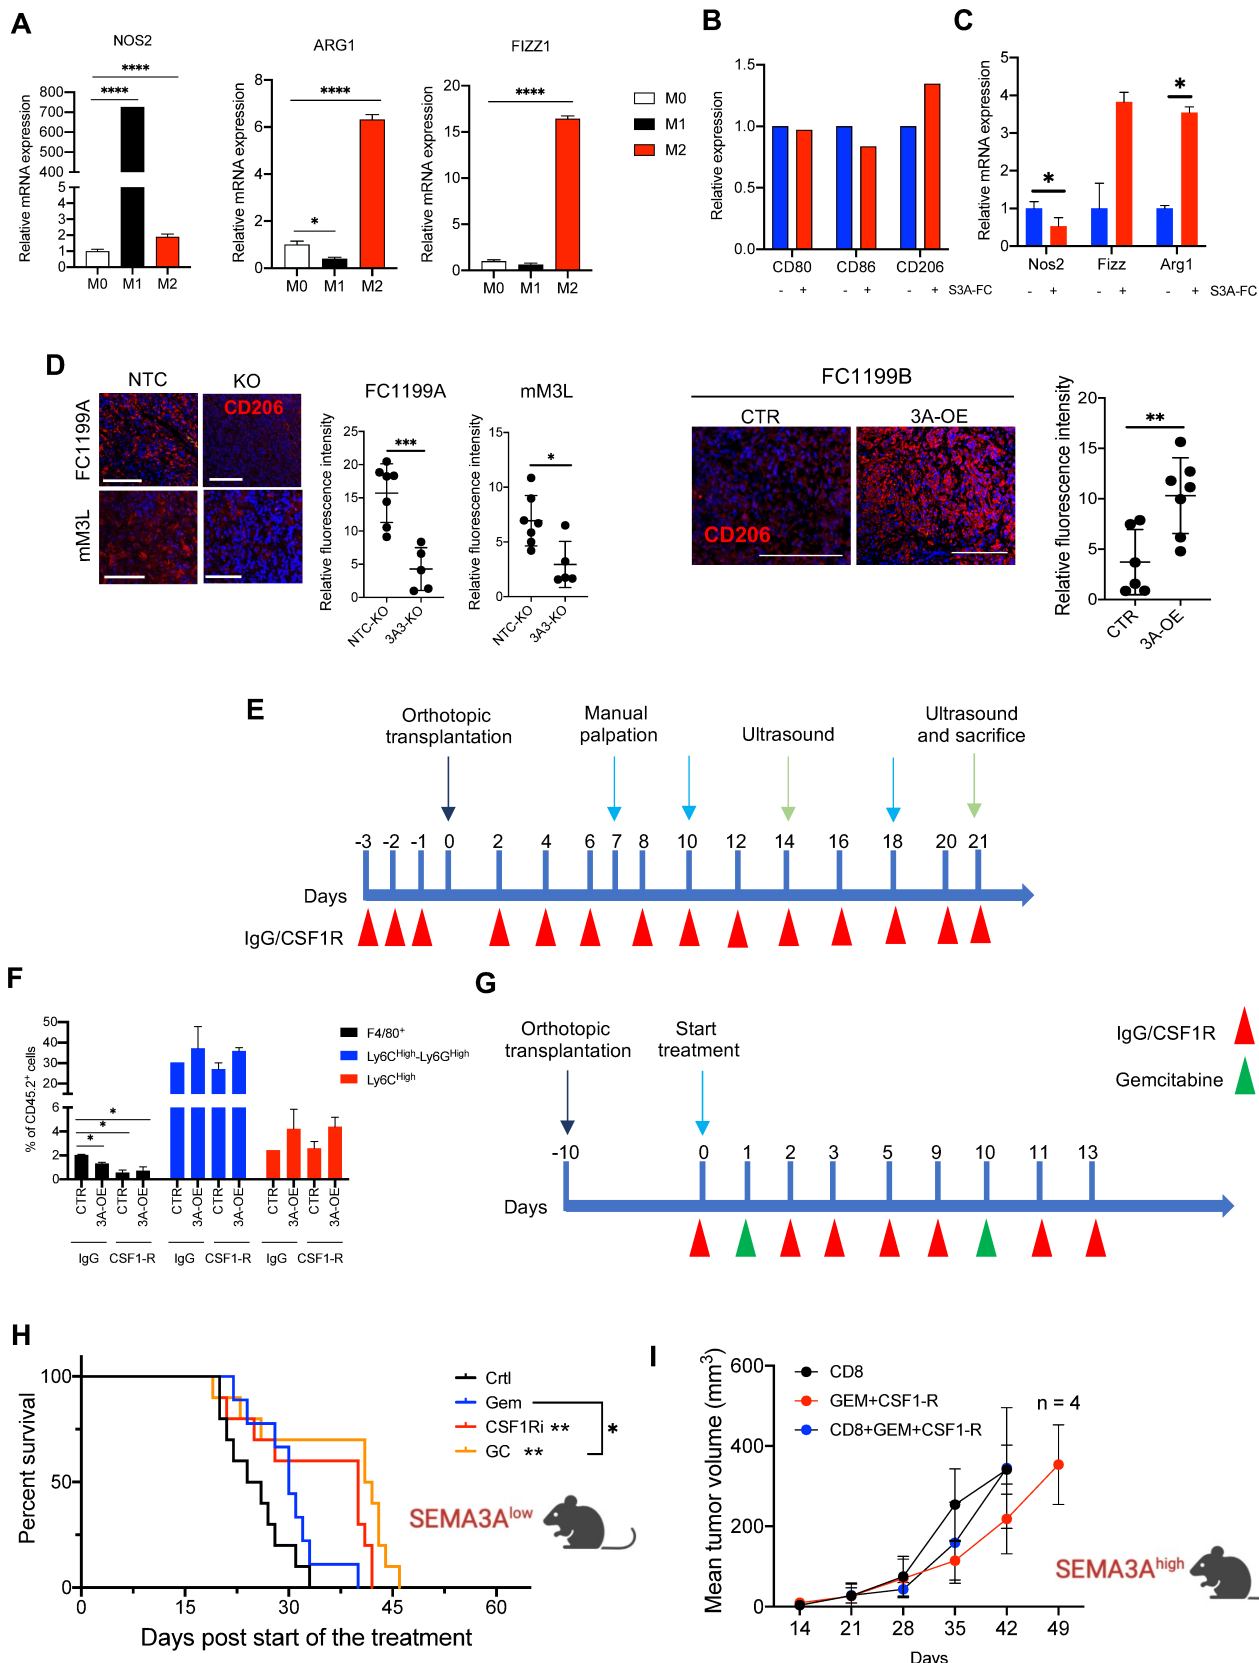

Figure S7

Supplement: gutjnl-2023-329807supp008_data_supplement.pdf [file gutjnl-2023-329807supp008_data_supplement.pdf]
